# Supplementary material for: The Simple Method of Preparation of Highly Carboxylated Bacterial Cellulose with Ni- and Mg-Ferrite-Based Versatile Magnetic Carrier for Enzyme Immobilization
Source: MDPI journal article supplement (doi:10.3390/ijms22168563), 2021-08-09
Supplement: s1 [file s1]

# The Simple Method of Preparation of Highly Carboxylated Bacterial Cellulose with Ni- and Mg-Ferrite-Based Versatile Magnetic Carrier for Enzyme Immobilization

Radosław Drozd, Magdalena Szymańska, Katarzyna Przygodzka, Jakub Hoppe, Grzegorz Leniec, Urszula Kowalska

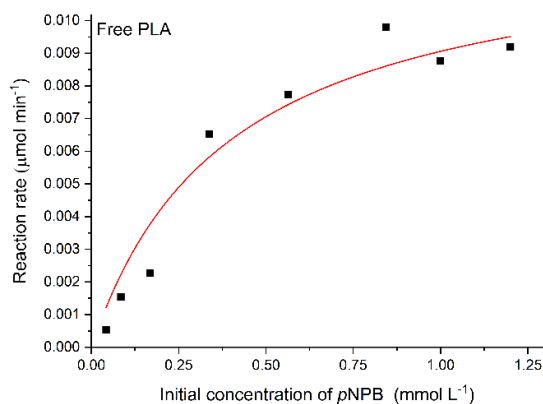

(a)

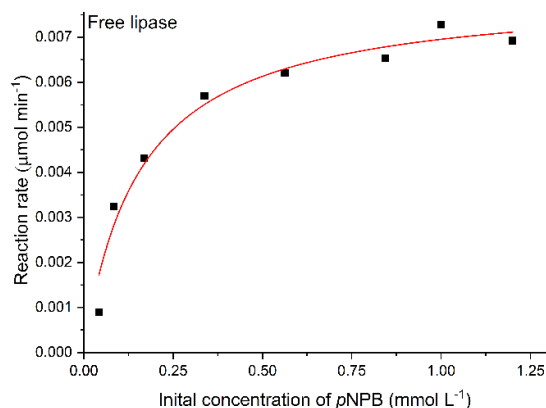

(b)

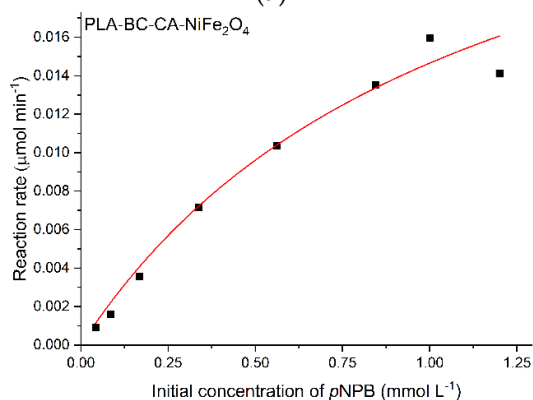

(c)

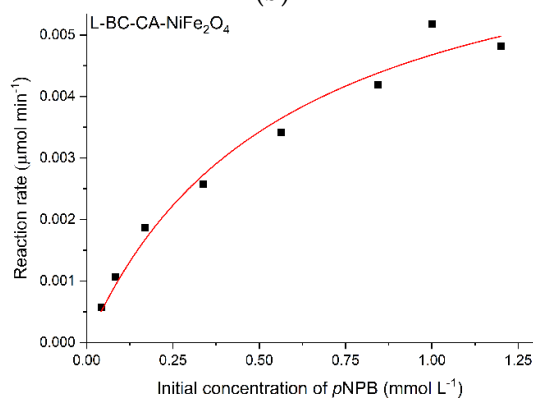

(d)

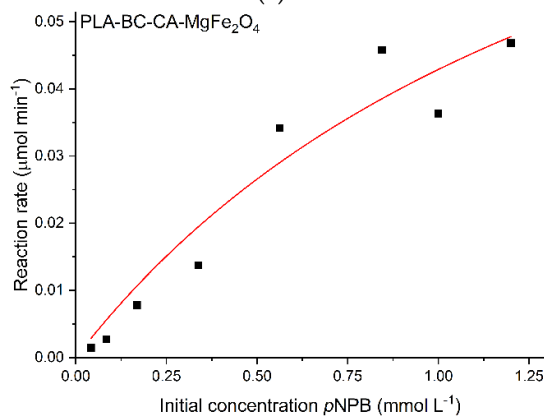

(e)

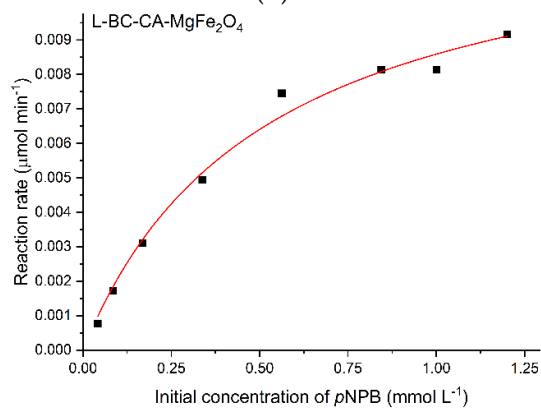

(f)

**Figure S3.** The representative dependences of reaction rate vs initial substrate concentration used for determination of catalytic constants of free and immobilized enzymes.
