# Supplementary material for: The Simple Method of Preparation of Highly Carboxylated Bacterial Cellulose with Ni- and Mg-Ferrite-Based Versatile Magnetic Carrier for Enzyme Immobilization
Source: MDPI journal article supplement (doi:10.3390/ijms22168563), 2021-08-09
Supplement: s1 [file s1]

# The Simple Method of Preparation of Highly Carboxylated Bacterial Cellulose with Ni- and Mg-Ferrite-Based Versatile Magnetic Carrier for Enzyme Immobilization

Radosław Drozd, Magdalena Szymańska, Katarzyna Przygodzka, Jakub Hoppe, Grzegorz Leniec, Urszula Kowalska

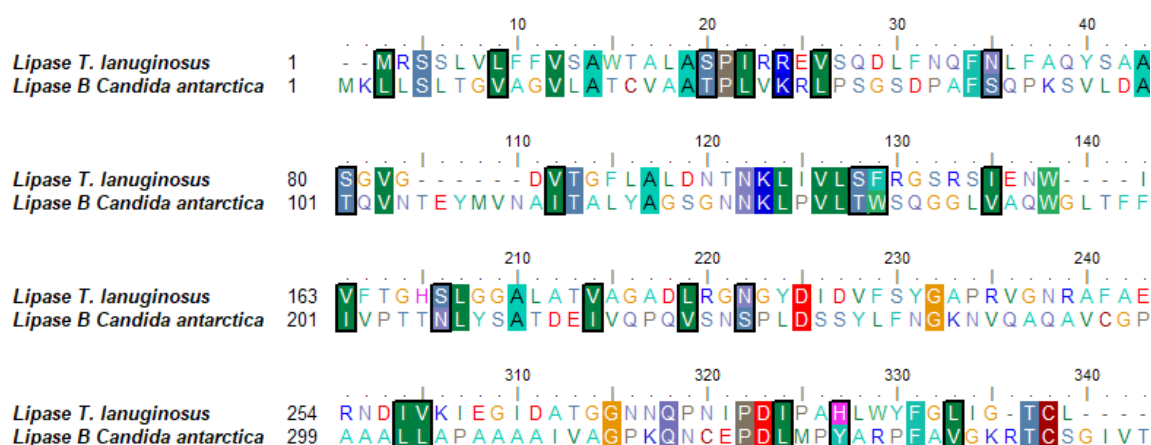

**Figure S2.** The pairwise comparison of amino acid sequences of lipase from *Thermomyces lanuginosus* (SwissProt; O59952) and lipase B from *Candida antarctica* (SwissProt; P41365). The alignment was done with using ClustalW via BioEdit software. The compared amino acid sequences of lipases shares a low level of similarity with a few short consensus regions (shaded letters).
