# Supplementary material for: The Simple Method of Preparation of Highly Carboxylated Bacterial Cellulose with Ni- and Mg-Ferrite-Based Versatile Magnetic Carrier for Enzyme Immobilization
Source: MDPI journal article supplement (doi:10.3390/ijms22168563), 2021-08-09
Supplement: s1 [file s1]

# The Simple Method of Preparation of Highly Carboxylated Bacterial Cellulose with Ni- and Mg-Ferrite-Based Versatile Magnetic Carrier for Enzyme Immobilization

Radosław Drozd, Magdalena Szymańska, Katarzyna Przygodzka, Jakub Hoppe, Grzegorz Leniec, Urszula Kowalska

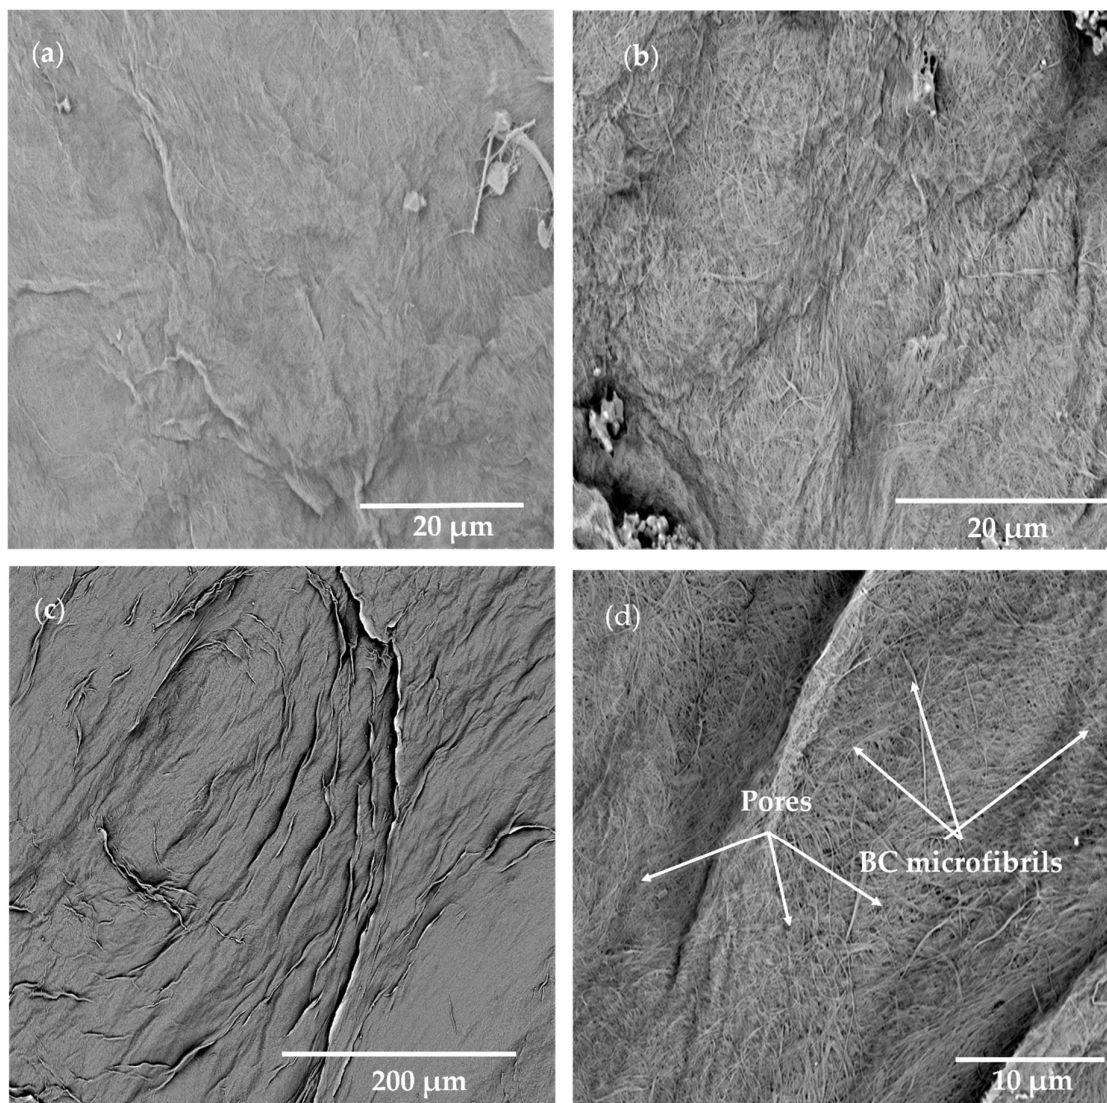

**Figure S1.** The SEM image of surface BC-CA-NiFe<sub>2</sub>O<sub>4</sub> (a), surface of BC-CA-MgFe<sub>2</sub>O<sub>4</sub> (b), surface not modified BC pulp (c,d).
